# Supplementary material for: Mitochondria-targeted ruthenium(ii) complexes for photodynamic therapy and GSH detection in living cells
Source: Royal Society of Chemistry journal article supplement (doi:10.1039/d3dt03701k), 2024-01-01
Supplement: d3dt03701k1.pdf [file d3dt03701k1.pdf]

# Supporting information

## Mitochondria-targeted ruthenium(II) complexes for photodynamic therapy and GSH detection in living cells

Wanqing Zhang, Weibin Chen, Fengfu Fu, Mei-Jin Li\*

### Materials and chemicals

The chemicals used were purchased from commercial suppliers and used directly without purification. 9,10-anthracenediyl-bis(methylene)dimalonic acid (ABDA), 1,3-Diphenylisobenzofuran (DPBF) and N-methylmaleimide (NEM) were purchased from Adamas Chemical Co. Cysteine (Cys), homocysteine (Hcy) and selenium oxide (SeO<sub>2</sub>) were purchased from Alfa Aesar Chemical Co. Glutathione (GSH) and Glutathione oxydized (GSSG) were purchased from Acros Organics. Ammonium hexafluorophosphate (NH<sub>4</sub>PF<sub>6</sub>) and arginine hydrochloride (Arg), methionine (Met), phenylalanine (Phe), tryptophan (Trp), threonine (Thr), valine (Val), leucine (Leu), histidine hydrochloride (His), isoleucine (Ile), lysine hydrochloride (Lys) were purchased from Sigma-Aldrich. Homocysteine (Hcy) was purchased from Tokyo Chemical Industry (TCL). CCK-8 was purchased from MedChemExpress LLC (China). MitoTracker Green FM was purchased from Next Sense Biotechnology (Shanghai) Co. Phosphate buffered saline (PBS) was purchased from Cellmax Chemical Co. 4,4-Dimethyl-2,2-bipyridine, RuCl<sub>3</sub> was purchased from Aladdin Reagent Co. 4-Methyl-2,2-bipyridine-4-carboxaldehyde and Ru(bpy)<sub>2</sub>Cl<sub>2</sub> were synthesized according to previously reported methods.<sup>1</sup> All other chemical reagents were of analytical grade and used directly without treatment.

### Instruments

<sup>1</sup>H NMR and <sup>13</sup>C NMR spectra were measured by JEOL (500 MHz) with

---

\* Corresponding author. *E-mail address: mjli@fzu.edu.cn*

Me<sub>4</sub>Si as internal standard. High resolution mass spectra (ESI-MS) were measured on a Thermo Finnigan DECAV-30000LCQ Deca XP mass spectrometer. Photoluminescence (PL) spectra and UV-visible absorption spectra were obtained on an Edinburgh FS5 EVOLUTION 220 and UV-visible spectrophotometer tests, and lifetimes were measured with an Edinburgh FLS920 spectrofluorometer. Crystal X-ray diffraction data were collected by a Bruker SMART diffractometer.

## Cytotoxicity

Calculation formula for cell viability:

$$\text{Cell viability (\%)} = \frac{[As-Ab]}{[Ac-Ab]} \times 100\%.$$

Where As: absorbance of experimental wells (with cells and complexes);

Ac: absorbance of control group (with cells);

Ab: absorbance of blank group (without cells and complexes).

## Synthesis

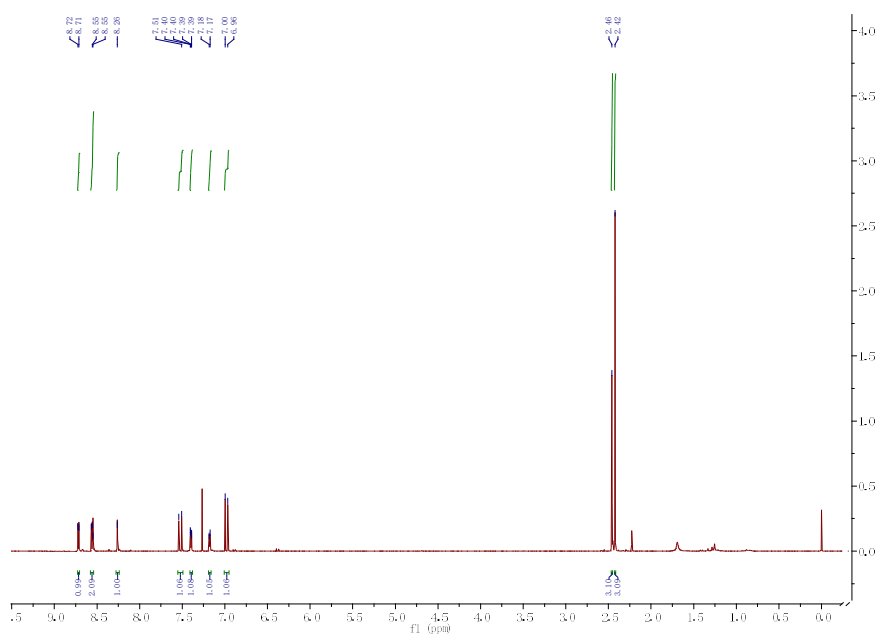

Fig. S1 <sup>1</sup>H NMR (500 MHz, CDCl<sub>3</sub>) spectrum of ligand **1**.

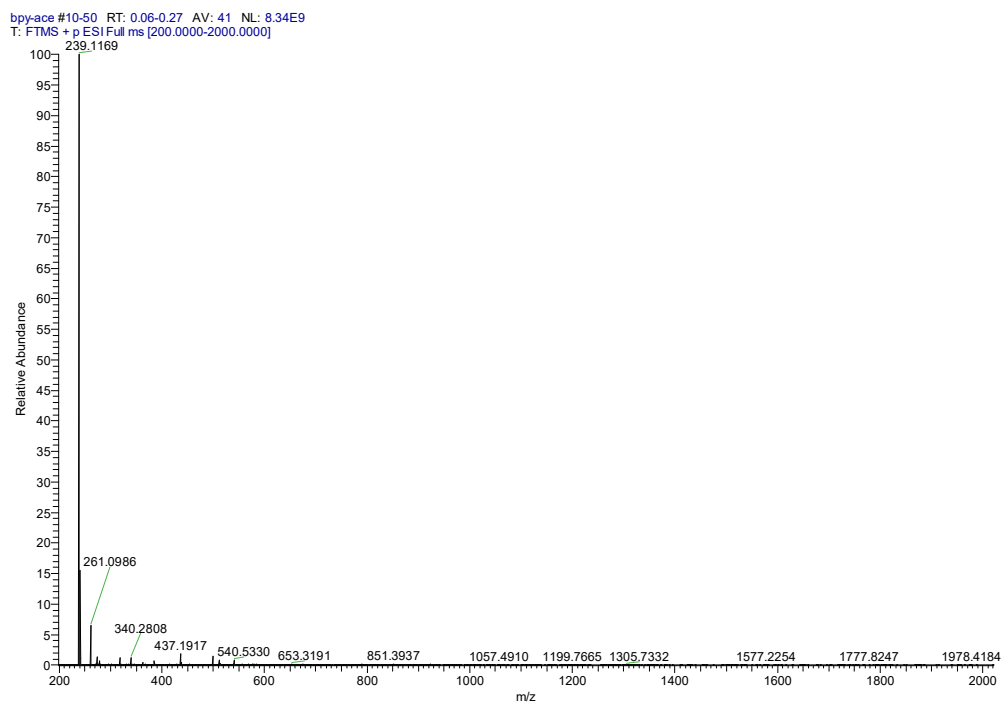

**Fig. S2** ESI-MS of ligand **1** in dichloromethane solution at room temperature:  
 $m/z=239.1169 \{M+H\}^+$ .

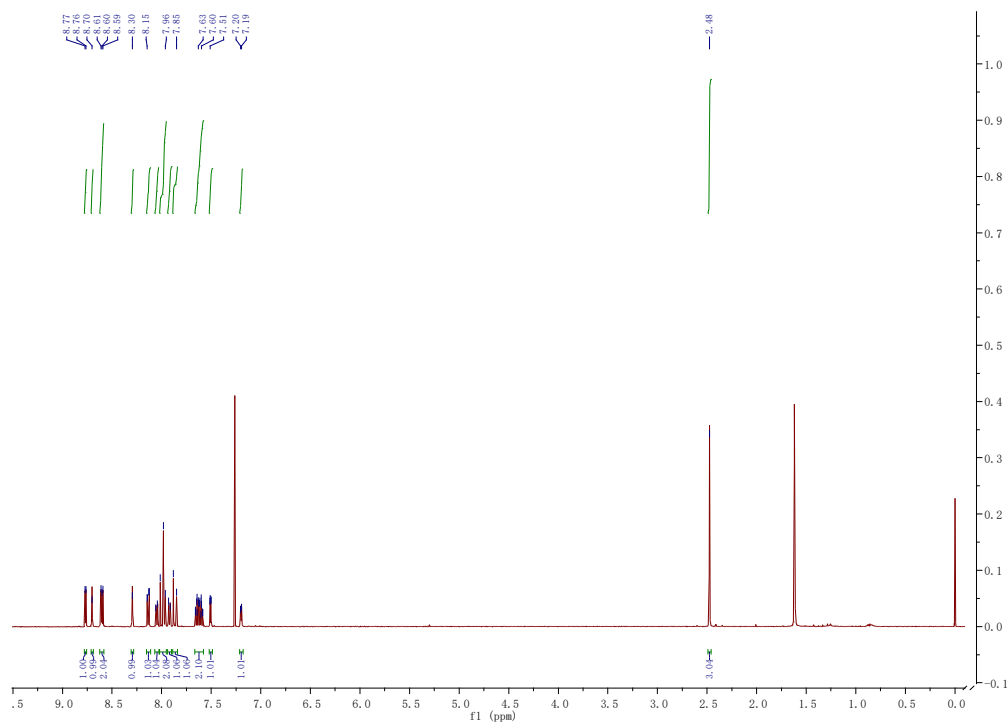

**Fig. S3**  $^1\text{H}$  NMR (500 MHz,  $\text{CDCl}_3$ ) spectrum of ligand **2**.

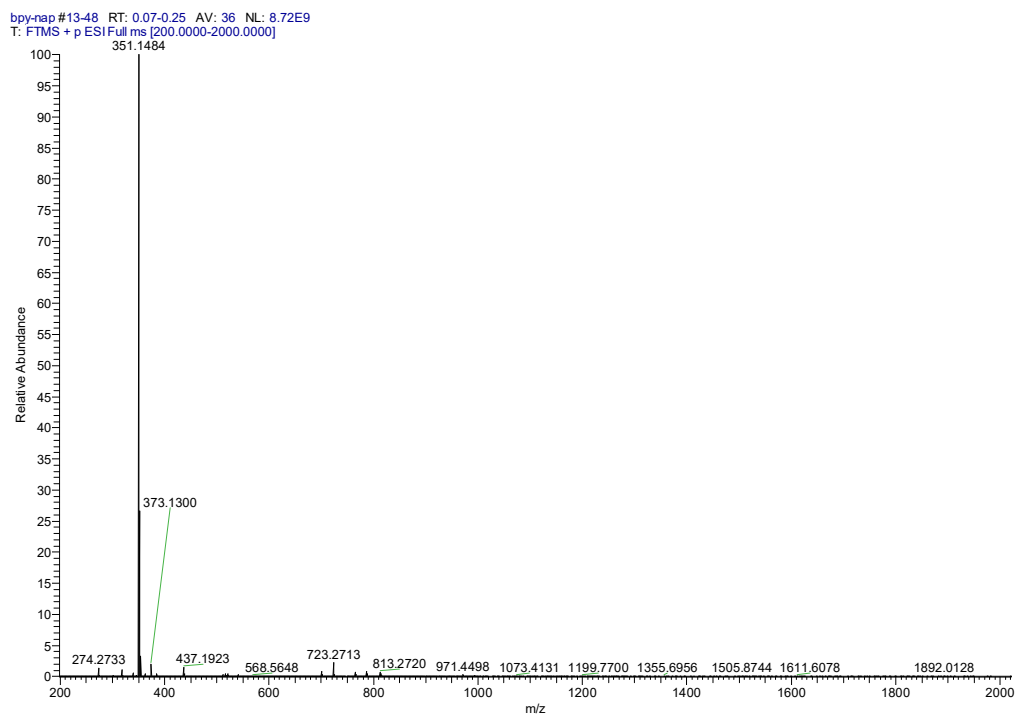

**Fig. S4** ESI-MS of ligand **2** in dichloromethane solution at room temperature:  
 $m/z=351.1484\{M+H\}^+$ .

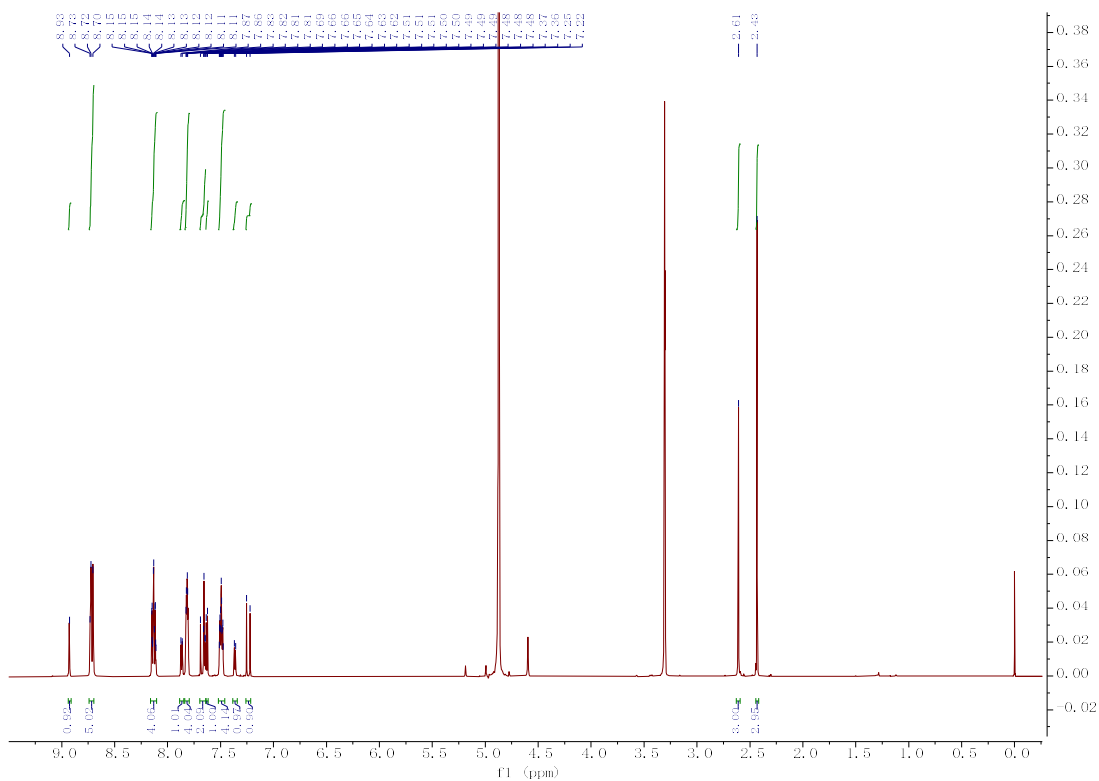

**Fig. S5(a)**  $^1\text{H}$  NMR (500 MHz, methanol- $d_4$ ) spectrum of **Ru-1**.

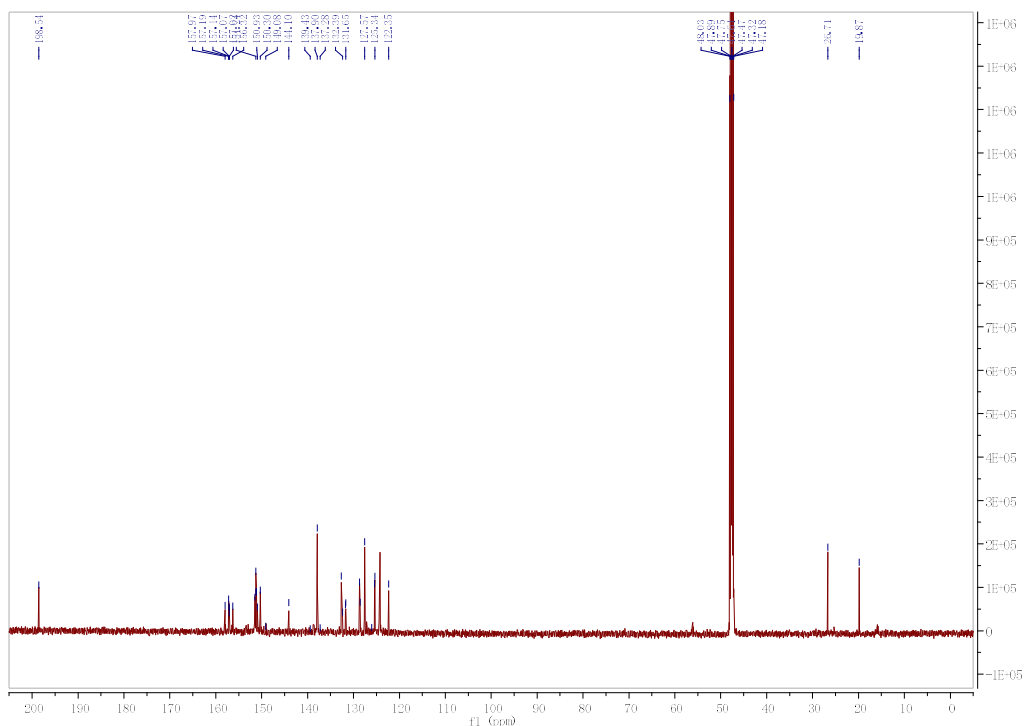

Fig. S5(b)  $^{13}\text{C}$  NMR (151 MHz, methanol- $d_4$ ) spectrum of Ru-1.

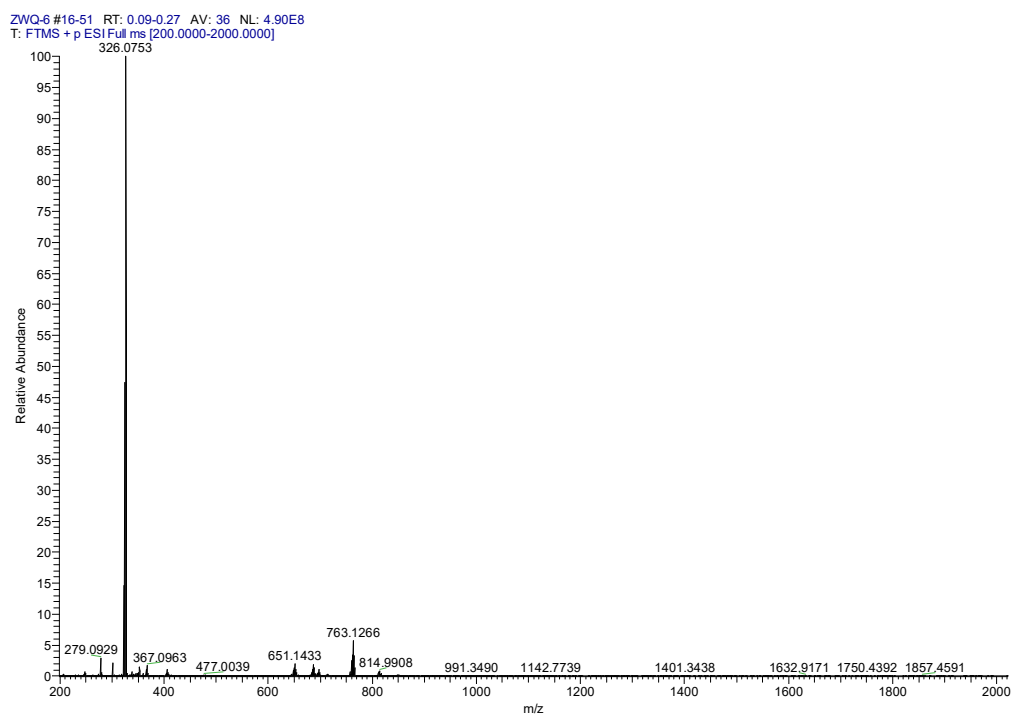

Fig. S6 ESI-MS of Ru-1 in aqueous solution at room temperature:  $m/z=326.0753 \{M-Cl_2\}^{2+}$ .



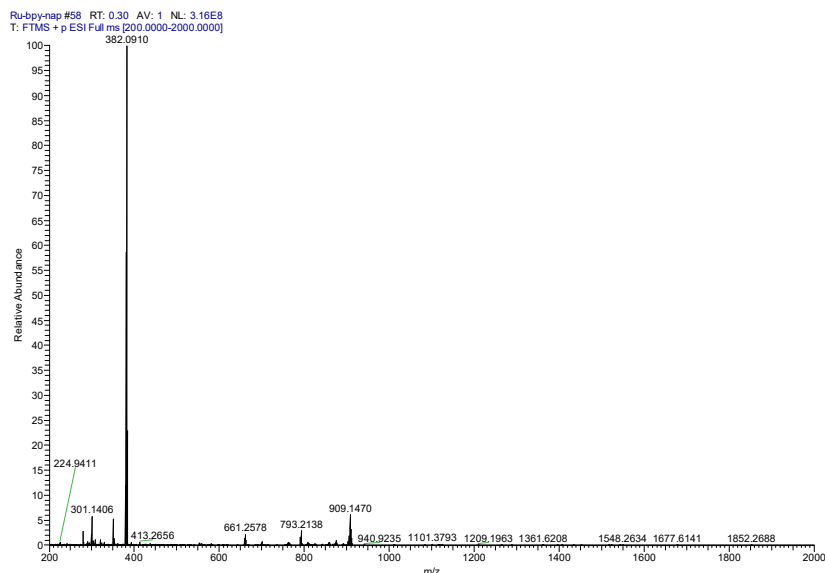

**Fig. S8** ESI-MS of **Ru-2** in aqueous solution at room temperature:  $m/z=382.0910 \{M-Cl_2\}^{2+}$ .

**Table S1** Crystallographic data and structural refinement data

| Complex                           | <b>Ru-1</b>                                                                                           | <b>Ru-2</b>                                                                                         |
|-----------------------------------|-------------------------------------------------------------------------------------------------------|-----------------------------------------------------------------------------------------------------|
| Identification code               | [Ru(bpy) <sub>2</sub> ligand1](PF <sub>6</sub> ) <sub>2</sub>                                         | [Ru(bpy) <sub>2</sub> ligand2](PF <sub>6</sub> ) <sub>2</sub>                                       |
| Empirical formula                 | C <sub>37.1</sub> H <sub>38.4</sub> F <sub>12</sub> N <sub>6</sub> O <sub>3.1</sub> P <sub>2</sub> Ru | C <sub>44</sub> H <sub>36.4</sub> F <sub>12</sub> N <sub>6</sub> O <sub>2.2</sub> P <sub>2</sub> Ru |
| Formula weight                    | 1008.95                                                                                               | 1075.40                                                                                             |
| Temperature/K                     | 296.15                                                                                                | 296.15                                                                                              |
| Crystal system                    | triclinic                                                                                             | triclinic                                                                                           |
| Space group                       | P-1                                                                                                   | P-1                                                                                                 |
| a/Å                               | 10.8450(6)                                                                                            | 9.9020(17)                                                                                          |
| b/Å                               | 11.8133(7)                                                                                            | 12.910(2)                                                                                           |
| c/Å                               | 17.1597(9)                                                                                            | 18.288(3)                                                                                           |
| α/°                               | 86.824(2)                                                                                             | 88.353(5)                                                                                           |
| β/°                               | 82.482(2)                                                                                             | 74.769(5)                                                                                           |
| γ/°                               | 73.339(2)                                                                                             | 87.246(5)                                                                                           |
| Volume/Å <sup>3</sup>             | 2087.7(2)                                                                                             | 2252.8(7)                                                                                           |
| Z                                 | 2                                                                                                     | 2                                                                                                   |
| ρ <sub>cal</sub> /cm <sup>3</sup> | 1.605                                                                                                 | 1.585                                                                                               |
| μ/mm <sup>-1</sup>                | 0.551                                                                                                 | 0.515                                                                                               |
| F(000)                            | 1020.0                                                                                                | 1084.0                                                                                              |
| Crystal size/mm <sup>3</sup>      | 0.16 × 0.14 × 0.1                                                                                     | 0.18 × 0.15 × 0.1                                                                                   |
| Radiation                         | MoKα(λ = 0.71073)                                                                                     | MoKα(λ = 0.71073)                                                                                   |
| 2θ range for data collection/°    | 3.6 to 50.172                                                                                         | 3.882 to 50.336                                                                                     |

|                                   |                                                                  |                                                                  |
|-----------------------------------|------------------------------------------------------------------|------------------------------------------------------------------|
| Index ranges                      | -12 ≤ h ≤ 12, -14 ≤ k ≤ 14,<br>-20 ≤ l ≤ 20                      | -11 ≤ h ≤ 11, -15 ≤ k ≤ 15,<br>-21 ≤ l ≤ 21                      |
| Reflections collected             | 53627                                                            | 60521                                                            |
| Independent reflections           | 7388 [R <sub>int</sub> = 0.0305,<br>R <sub>sigma</sub> = 0.0201] | 8056 [R <sub>int</sub> = 0.0577,<br>R <sub>sigma</sub> = 0.0384] |
| Data/restraints/parameters        | 7388/465/575                                                     | 8056/25/597                                                      |
| Goodness-of-fit on F <sup>2</sup> | 1.042                                                            | 1.141                                                            |
| Final R indexes [I ≥ 2σ(I)]       | R <sub>1</sub> = 0.0532, wR <sub>2</sub> = 0.1277                | R <sub>1</sub> = 0.0644, wR <sub>2</sub> = 0.1667                |
| Final R indexes [all data]        | R <sub>1</sub> = 0.0602, wR <sub>2</sub> = 0.1353                | R <sub>1</sub> = 0.1112, wR <sub>2</sub> = 0.2204                |

**Table S2** Selected bond lengths (Å) and angles (°) for **Ru-1** and **Ru-2**

| <b>Ru-1</b> |           | <b>Ru-2</b> |           |
|-------------|-----------|-------------|-----------|
| Ru1-N4      | 2.060(3)  | Ru1-N5      | 2.037(5)  |
| Ru1-N2      | 2.059(3)  | Ru1-N3      | 2.053(5)  |
| Ru1-N5      | 2.055(3)  | Ru1-N4      | 2.049(5)  |
| Ru1-N1      | 2.061(3)  | Ru1-N6      | 2.061(5)  |
| Ru1-N3      | 2.064(3)  | Ru1-N2      | 2.062(5)  |
| Ru1-N6      | 2.052(3)  | Ru1-N1      | 2.061(5)  |
| C32-C33     | 1.328(7)  | C32-C33     | 1.304(9)  |
| O1-C34      | 1.217(7)  | O1-C34      | 1.220(8)  |
| N2-Ru1-N1   | 78.91(13) | N5-Ru1-N4   | 78.22(19) |
| N5-Ru1-N6   | 78.83(13) | N1-Ru1-N2   | 79.0(2)   |
| N3-Ru1-N4   | 78.64(13) | N3-Ru1-N6   | 78.65(18) |

## Sensing of GSH by complexes



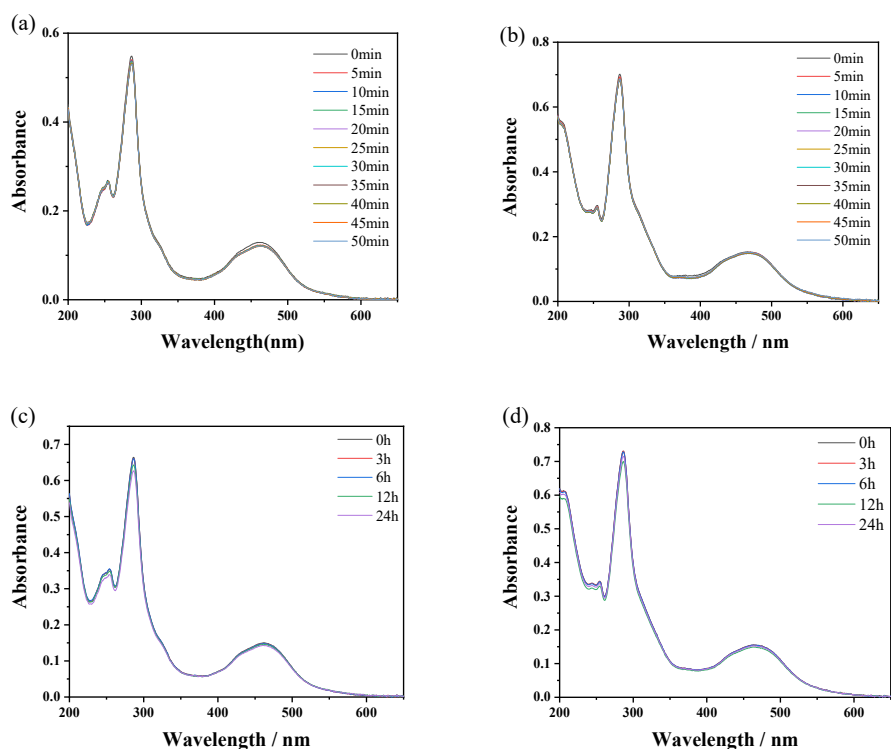

**Fig. S9** (a) and (b) The photostability of **Ru-1** (10  $\mu\text{M}$ ) and **Ru-2** (10  $\mu\text{M}$ ) in aqueous solution by UV-visible absorption, respectively; (c) and (d) The stability of **Ru-1** (10  $\mu\text{M}$ ) and **Ru-2** (10  $\mu\text{M}$ ) in aqueous solution by UV-visible absorption, respectively.

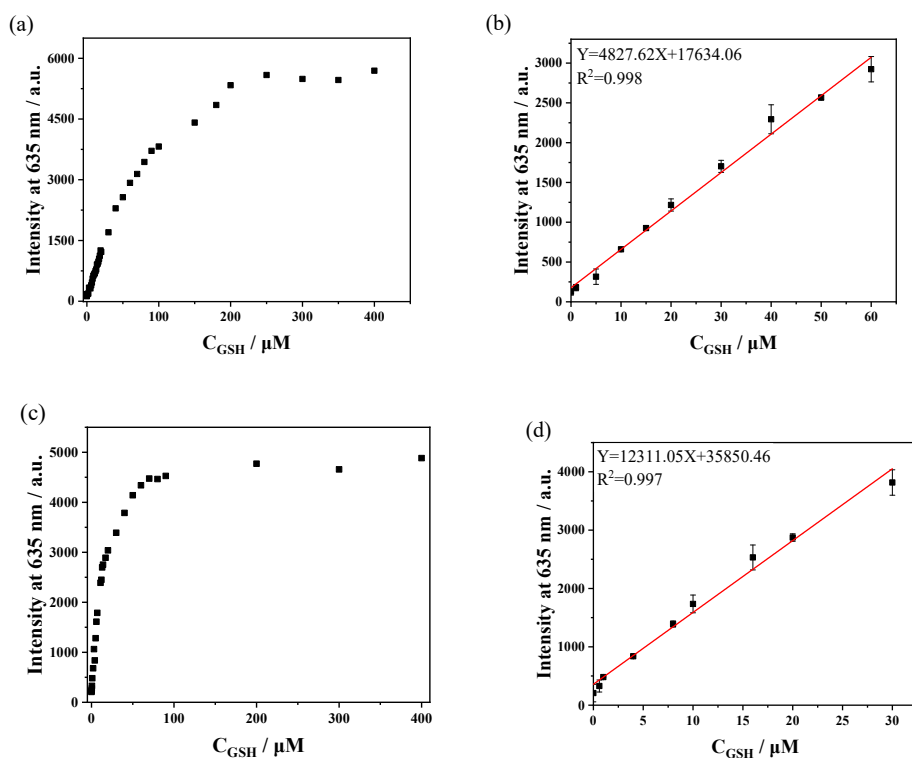

**Fig. S10** (a) Variation of luminescence intensity of **Ru-1** (10  $\mu\text{M}$ ) and GSH (0-40 eq.). (b) Linear plot of **Ru-1** (10  $\mu\text{M}$ ) GSH (0-60  $\mu\text{M}$ ); (c) Variation of luminescence intensity of **Ru-2** (10  $\mu\text{M}$ ) and GSH (0-40 eq.); (d) linear plot of **Ru-2** (10  $\mu\text{M}$ ) and GSH (0-30  $\mu\text{M}$ ).

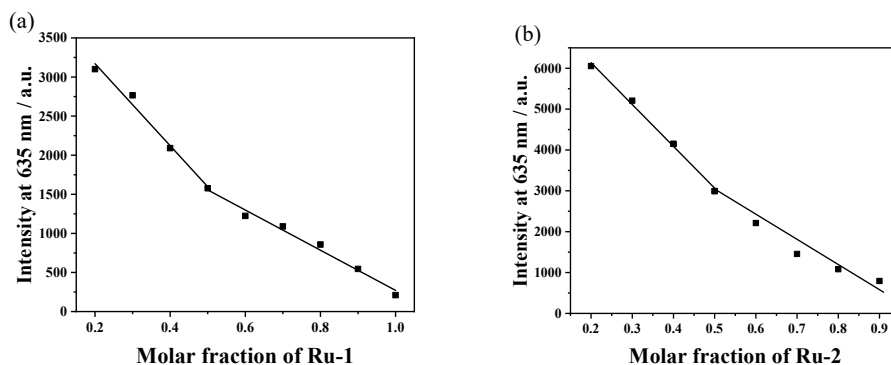

**Fig. S11** (a) and (b) Luminescence plots of **Ru-1** and **Ru-2** (10  $\mu\text{M}$ ) in the presence of GSH at molar ratios of 1, 0.9, 0.8, 0.7, 0.6, 0.5, 0.4, 0.3 and 0.2, respectively. Phosphate buffer (10 mM, pH = 7.4), **Ru-1** ( $\lambda_{\text{ex}} = 435 \text{ nm}$ ,  $\lambda_{\text{em}} = 635 \text{ nm}$ ), **Ru-2** ( $\lambda_{\text{ex}} = 425 \text{ nm}$ ,  $\lambda_{\text{em}} = 635 \text{ nm}$ ).

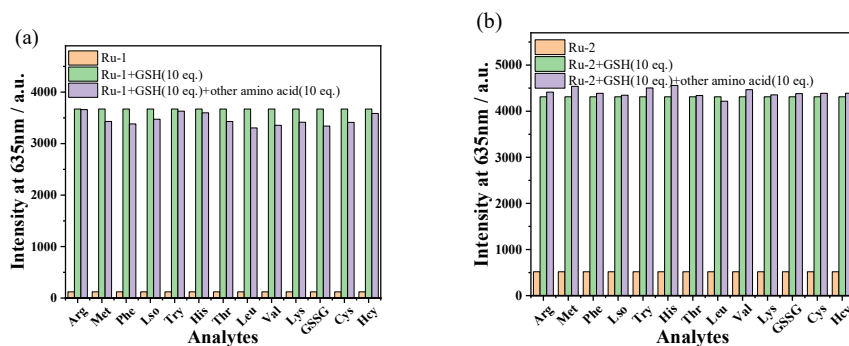

**Fig. S12** (a) and (b) Luminescence plots of **Ru-1** and **Ru-2** (10  $\mu\text{M}$ ) against GSH (100  $\mu\text{M}$ ) and other amino acids (100  $\mu\text{M}$ ); Phosphate buffer (10 mM, pH = 7.4), **Ru-1** ( $\lambda_{\text{ex}} = 435 \text{ nm}$ ,  $\lambda_{\text{em}} = 635 \text{ nm}$ ), **Ru-2** ( $\lambda_{\text{ex}} = 425 \text{ nm}$ ,  $\lambda_{\text{em}} = 635 \text{ nm}$ ).

## Mechanism

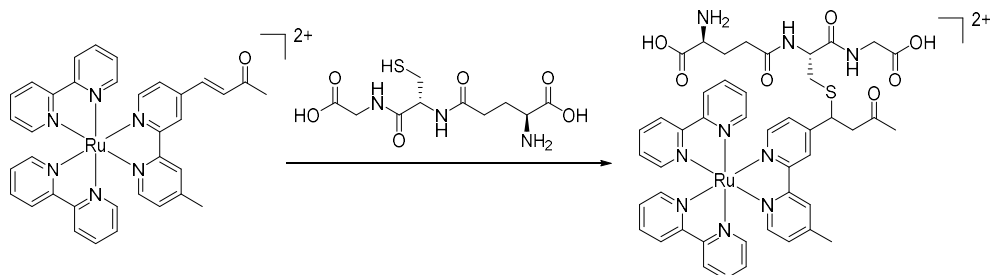

**Fig. S13** Reaction of **Ru-1** with GSH in aqueous solution.

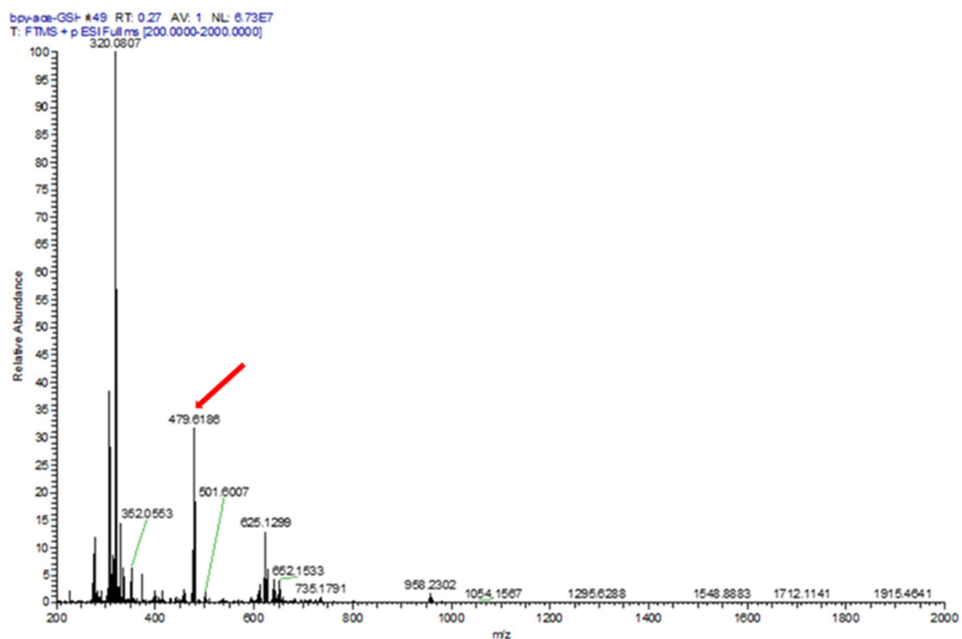

**Fig. S14** ESI-MS of **Ru-1**+GSH in aqueous solution at room temperature.

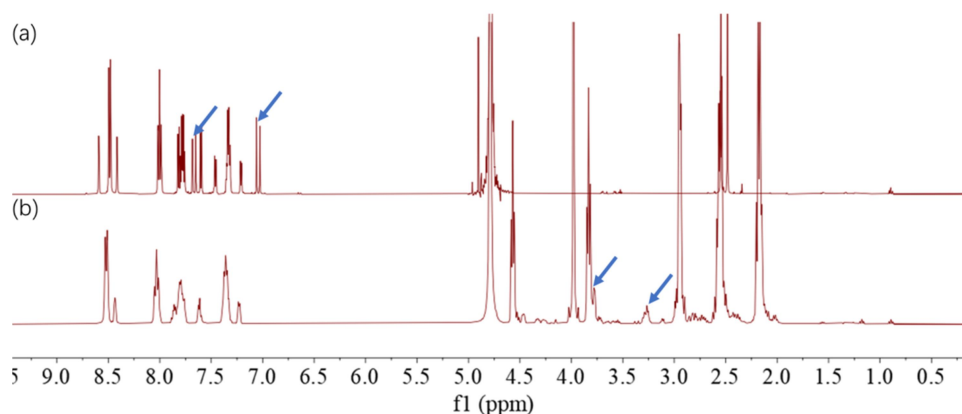

**Fig. S15**  $^1\text{H}$  NMR (500 MHz,  $\text{D}_2\text{O}-d$ ) spectrum of (a) **Ru-1** and (b) **Ru-1**+GSH.

## Singlet oxygen

$$\Phi_{\text{T}} = \Phi_{\text{ref}} \cdot S_{\text{T}} \cdot F_{\text{ref}} / (S_{\text{ref}} \cdot F_{\text{T}})$$

Where, the subscript T denotes the substance to be measured, and ref denotes the reference  $\text{Ru}(\text{bpy})_3^{2+}$  ( $\Phi_{\text{ref}} = 0.56$ , in  $\text{CH}_3\text{CN}$ ). S represents the slope of the linear fit with irradiation time as X and the change in absorbance of DPBF at 413 nm as Y.

F: Absorption correction factor; OD: Absorbance value of the co-ordinate at 450 nm.

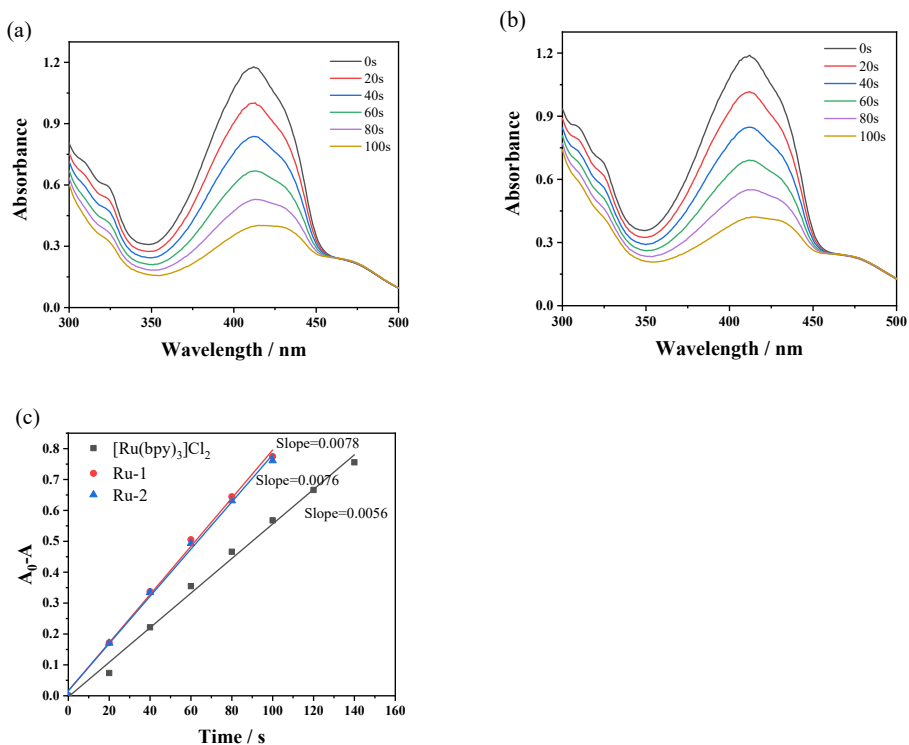

**Fig. S16** (a) Absorption spectra of (a) **Ru-1** (20  $\mu\text{M}$ ) and (b) **Ru-2** (20  $\mu\text{M}$ ) with DPBF (50  $\mu\text{M}$ ) irradiated at 450 nm in acetonitrile solution; (c) Changes in the absorbance at 413 nm of **Ru-1**, **Ru-2** and  $\text{Ru}(\text{bpy})_3^{2+}$  with DPBF irradiated at 450 nm in acetonitrile.

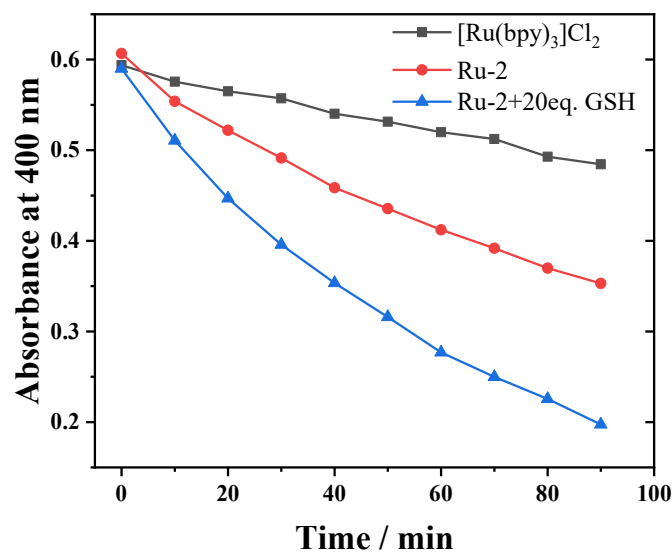

**Fig. S17** Changes in the absorbance at 400 nm of  $\text{Ru}(\text{bpy})_3^{2+}$  (10  $\mu\text{M}$ ), **Ru-2** (10  $\mu\text{M}$ ) and **Ru-2** (10  $\mu\text{M}$ ) +GSH (20eq. of complex) with ABDA (60  $\mu\text{M}$ ) irradiated at 450 nm in  $\text{H}_2\text{O}$ .

**Table S3** IC<sub>50</sub> and PI values of the complexes reported in the literature for different cell lines

| Complex                                                                             | Cell lines | Dark         | Irradiation  | PI   | references |
|-------------------------------------------------------------------------------------|------------|--------------|--------------|------|------------|
| 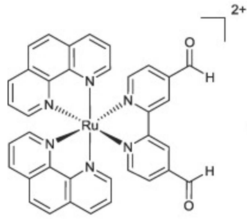   | HeLa       | 100          | 81.3         | 1.2  | 2          |
|    | HeLa       | 100          | 18.2         | 5.5  | 2          |
|   | HeLa       | 31.3         | 3.8          | 8.24 | 3          |
|  | HeLa       | 77.48 ± 0.68 | 12.05 ± 0.33 | 6.4  | 4          |
|  | HeLa       | 52.1 ± 2.7   | 18.4 ± 1.1   | 2.8  | 4          |
|  | HeLa       | 65.3 ± 1.4   | 15.8 ± 1.5   | 4.1  | 4          |
|  | HeLa       | 42.2 ± 4.1   | 4.66 ± 0.40  | 9.1  | 4          |
|  | HeLa       | 100          | 21.4 ± 1.7   | 4.7  | 5          |

|                                                                                   |       |                  |       |       |   |
|-----------------------------------------------------------------------------------|-------|------------------|-------|-------|---|
| 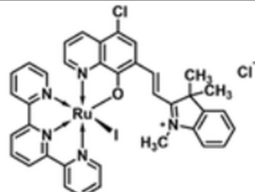 | MCF-7 | 43 $\mu\text{M}$ | 3.1   | 13.9  | 6 |
|  | A549  | >100             | 1.15  | 87.0  | 7 |
|  | A549  | >100             | 0.30  | 333.3 | 7 |
|  | A549  | >100             | 82.13 | 1.2   | 7 |
|  | A549  | >100             | 71.44 | 1.4   | 7 |

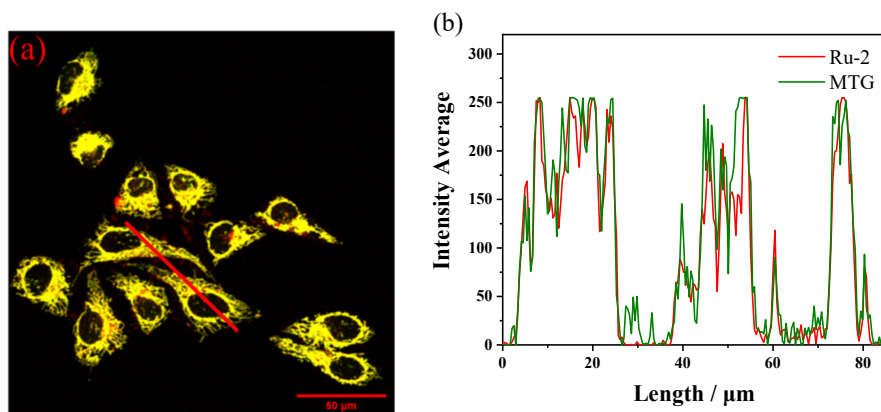

**Fig. S18** (a) Merged image of co-localised fluorescence imaging of HeLa cells with Ru-2 (30  $\mu\text{M}$ ) and Mito-tracker Green (250 nM); (b) Intensity profiles of regions of interest (ROI) across HeLa cells.

## References

- 1 M.-J. Li, C.-Q. Zhan, M.-J. Nie, G.-N. Chen, X. Chen, *J. Inorg. Biochem.* 2011, **105**, 420-425.
- 2 J. Karges, F. Heinemann, F. Maschietto, M. Patra, O. Blacque, I. Ciofini, B. Spingler, G. Gasser, *Bioorg. Med. Chem.*, 2019, **27**, 2666-2675.
- 3 P. Yang, S. Q. Zhang, K. Wang, H. L. Qi, *Dalton Transactions* 2021, **50**, 17338-17345.
- 4 X. Liu, G. Li, M. J. Xie, S. Guo, W. L. Zhao, F. Y. Li, S. J. Liu, Q. Zhao, *Dalton*

*Trans.*, 2020, **49**, 11192-11200.

5 S. Q. Zhang, T. T. Meng, J. Li, F. Hong, J. Liu, Y. J. Wang, L. H. Gao, H. Zhao, K. Z. Wang, *Inorg. Chem.*, 2019, **58**, 14244-14259.

6 G. L. He, N. Xu, H. Y. Ge, Y. Lu, R. Wang, H. X. Wang, J. J. Du, J. L. Fan, W. Sun, X. J. Peng, *ACS Appl. Mater. Interfaces*, 2021, **13**, 19572-19580.

7 L. Wei, X. D. He, D. M. Zhao, M. Kandawa-Shultz, G. Q. Shao, Y. H. Wang, *Eur. J. Med. Chem.*, 2024, **264**, 115985.
